# Supplementary material for: Self-assembly of rod-coils consisting of tetraaniline and alkyl chains in different oxidation states
Source: Royal Society of Chemistry journal article supplement (doi:10.1039/b914912k), 2009-12-15
Supplement: b914912k.pdf [file b914912k.pdf]

# Supplementary data for Self-Assembly of Rod-Coils Consisting of Tetraaniline and Alkyl Chains in Different Oxidation States

Hoon Kim, Ji-Woong Park\*

*Department of Materials Science and Engineering, Gwangju Institute of Science and  
Technology, 261 Cheomdan-gwagiro (Oryong-dong), Buk-gu, Gwangju 500-712 Republic of  
Korea, E-mail: jiwoong@gist.ac.kr*

## <sup>1</sup>H NMR spectra of alkyl tetraanilines in their EB state

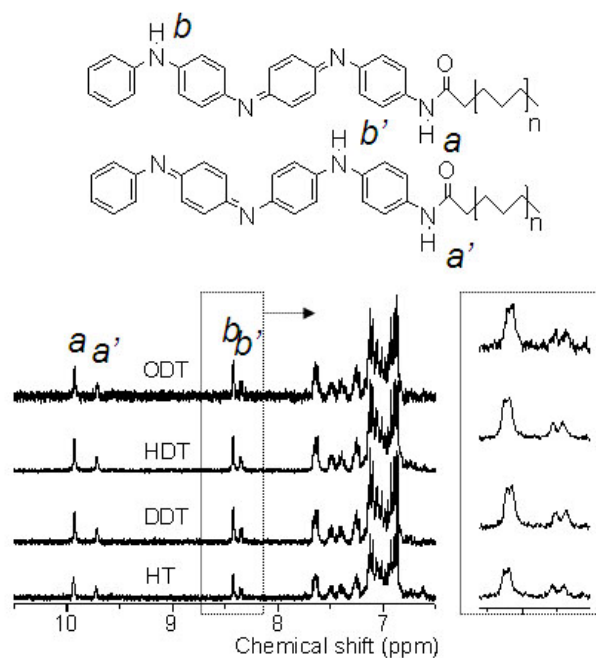

**Fig. S1** <sup>1</sup>H NMR spectra of alkyl tetraanilines in their EB state. The dotted box in right bottom represents the magnification of *b* and *b'*.
